# Supplementary material for: Disruption of auto-inhibition underlies conformational signaling of ASIC1a to induce neuronal necroptosis
Source: PubMed Central journal article supplement (PMC6981194; doi:10.1038/s41467-019-13873-0), 2020-01-24
Supplement: 41467_2019_13873_MOESM5_ESM.pdf [file 41467_2019_13873_MOESM5_ESM.pdf]

**Title:** Supplementary Data 1

**Description:** The predicted peptides in MS.

**Title:** Supplementary Data 2

**Description:** Exact p value and related statistical methods
